# Supplementary material for: Development of novel thiazolidine-2,4-dione derivatives as PPAR-γ agonists through design, synthesis, computational docking, MD simulation, and comprehensive in vitro and in vivo evaluation
Source: Royal Society of Chemistry journal article supplement (doi:10.1039/d3md00273j), 2023-01-01
Supplement: d3md00273j1.pdf [file d3md00273j1.pdf]

## (Z)-5-(Thiophen-2-ylmethylene) thiazolidine-2,4-dione

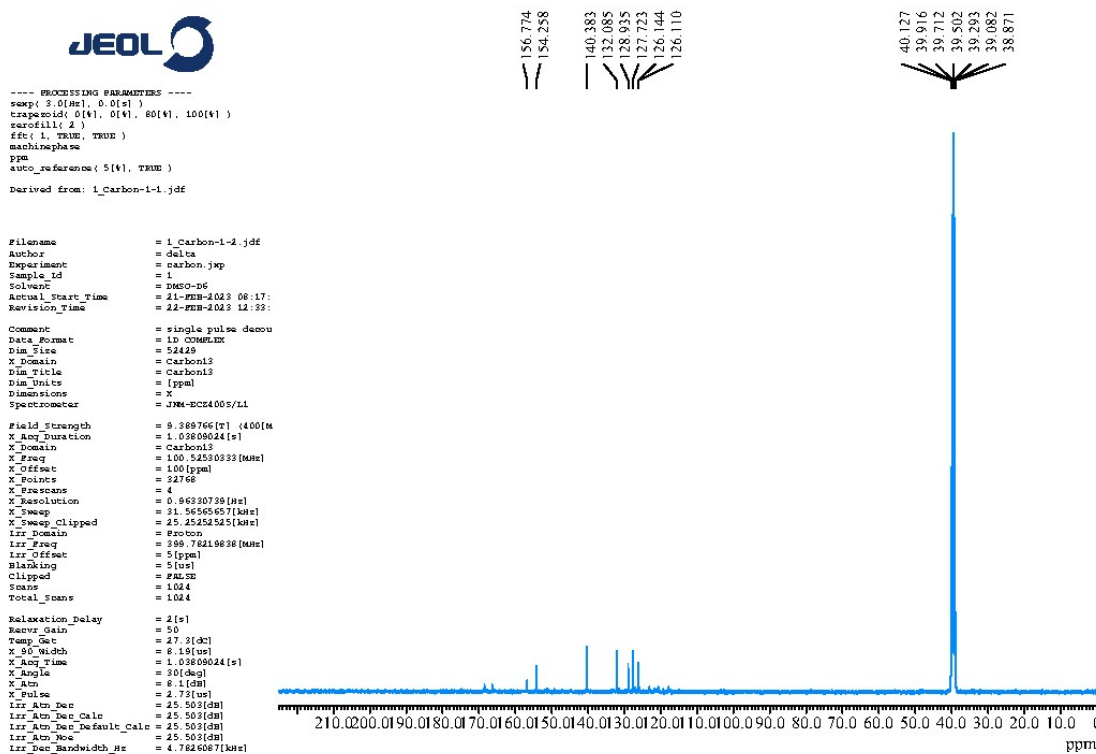

## (Z)-5-(Thiophen-2-ylmethylene) thiazolidine-2,4-dione

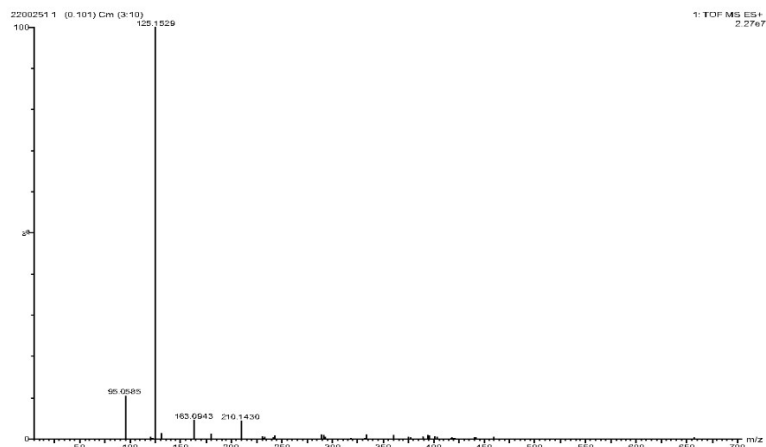

**(Z)-2-(2,4-Dioxo-5-(thiophen-2-ylmethylene) thiazolidin-3-yl)-N-(3-(trifluoromethyl) phenyl) acetamide (3h):** yellow solid, yield 78%, MP231–233 °C, FTIR (KBr,  $\text{cm}^{-1}$ ): 3472.10 (NH), 3033.45 (Ar C–H), 1732.68 (C=O), 1157.42 (C–N).  $^1\text{H-NMR}$  ( $\delta$  ppm,  $\text{DMSO-}d_6$ ): 4.340 (s, 2H,  $\text{CH}_2$ ), 7.439–7.726 (m, 8H, Ar-H), 12.880 (s, 1H, NH),  $^{19}\text{F NMR}$  ( $\delta$  ppm,  $\text{CDCl}_3$ ): -61.412 (s, 3F,  $\text{CF}_3$ );  $^{13}\text{C-NMR}$  ( $\delta$  ppm,  $\text{DMSO-}d_6$ ): 50.17, 117.76, 120.61, 120.79, 121.55, 121.60, 123.05, 123.16, 126.10, 126.14, 127.72, 128.93, 132.08, 140.38, 154.25, 156.77, 166.32, and 168.48. MS (m/z):  $\text{M}^+$  analyzed 412.0255,  $\text{M}^+$  predicted 412.4063.

**(Z)-2-(2,4-Dioxo-5-(thiophen-2-ylmethylene)thiazolidin-3-yl)-N-(3-(trifluoromethyl)phenyl)acetamide (3h)**

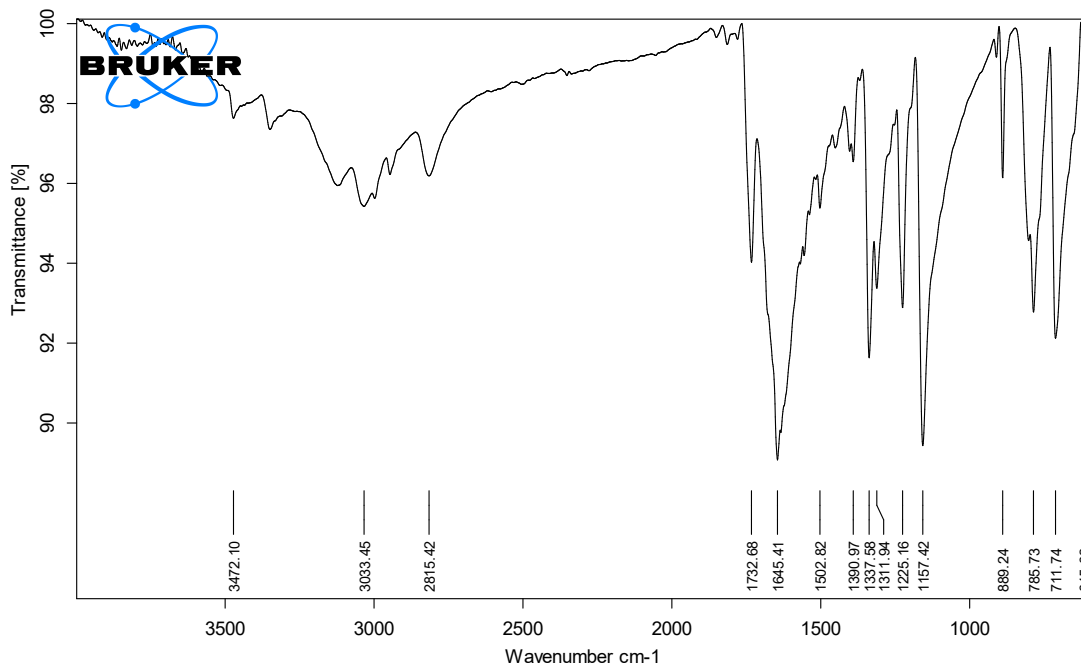

**(Z)-2-(2,4-Dioxo-5-(thiophen-2-ylmethylene)thiazolidin-3-yl)-N-(3-(trifluoromethyl)phenyl)acetamide(3h):**

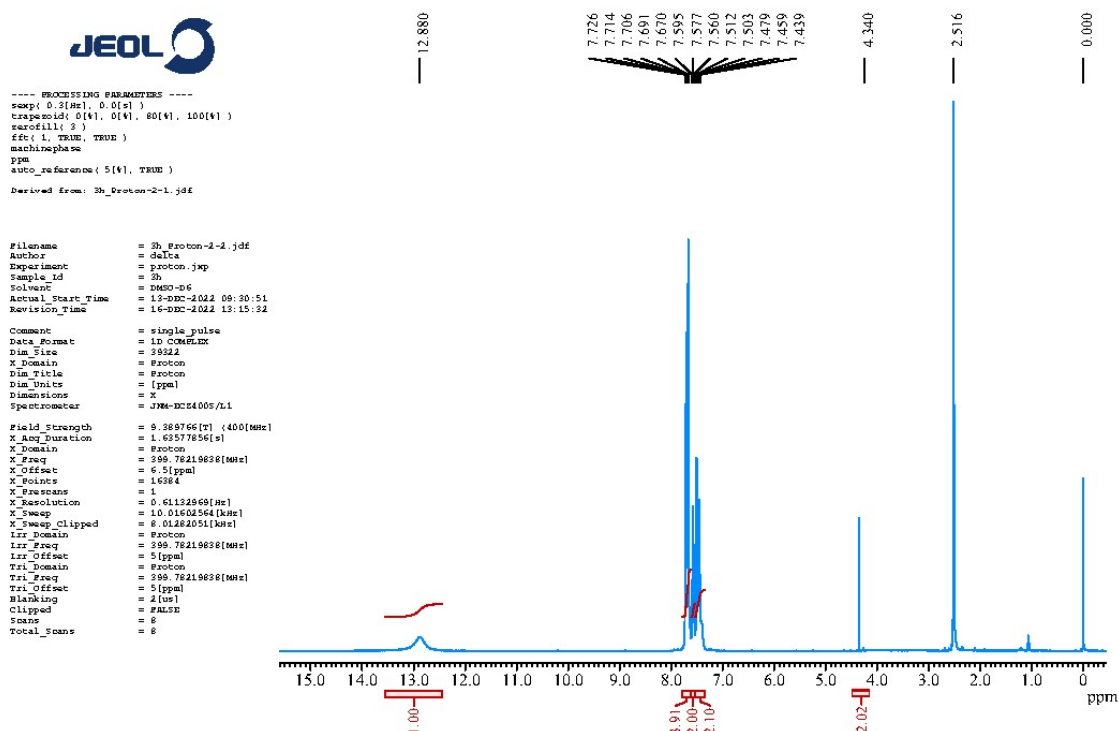

**(Z)-2-(2,4-Dioxo-5-(thiophen-2-ylmethylene)thiazolidin-3-yl)-N-(3-(trifluoromethyl)phenyl)acetamide(3h):**

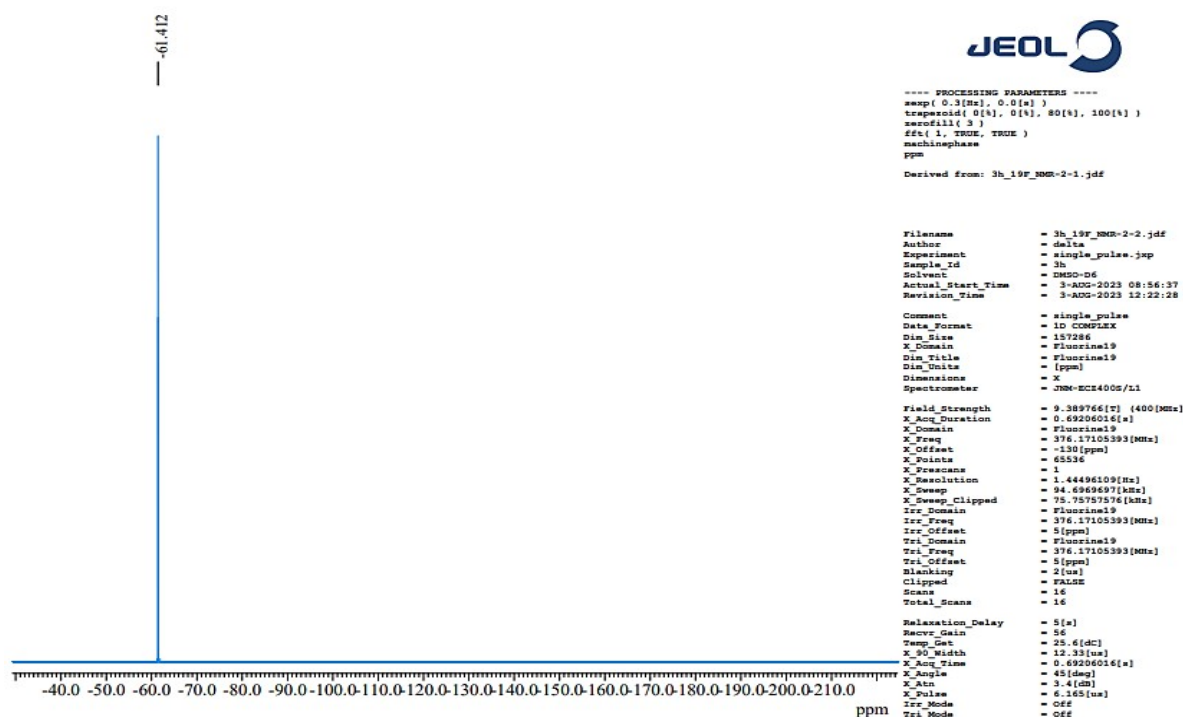

**(Z)-2-(2,4-Dioxo-5-(thiophen-2-ylmethylene)thiazolidin-3-yl)-N-(3-(trifluoromethyl)phenyl)acetamide (3h):**

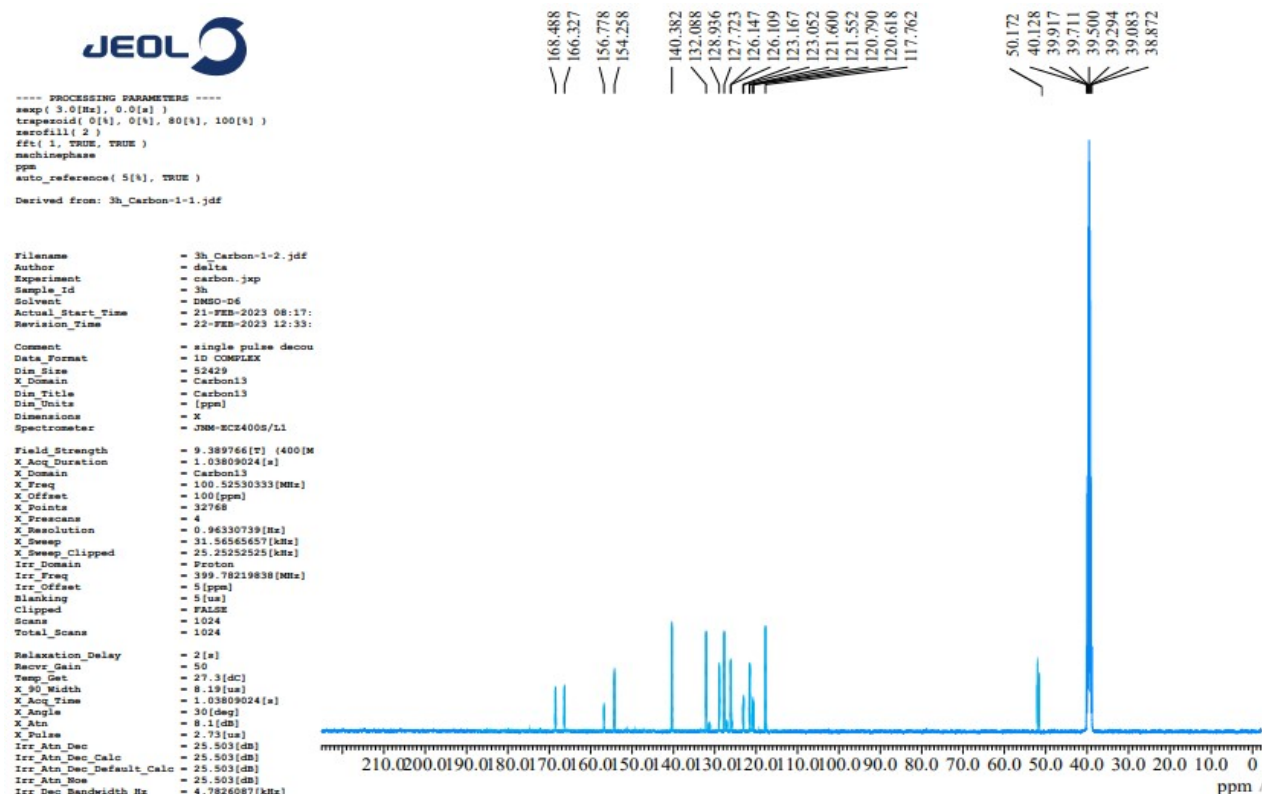

**(Z)-2-(2,4-Dioxo-5-(thiophen-2-ylmethylene)thiazolidin-3-yl)-N-(3-(trifluoromethyl)phenyl)acetamide (3h):**

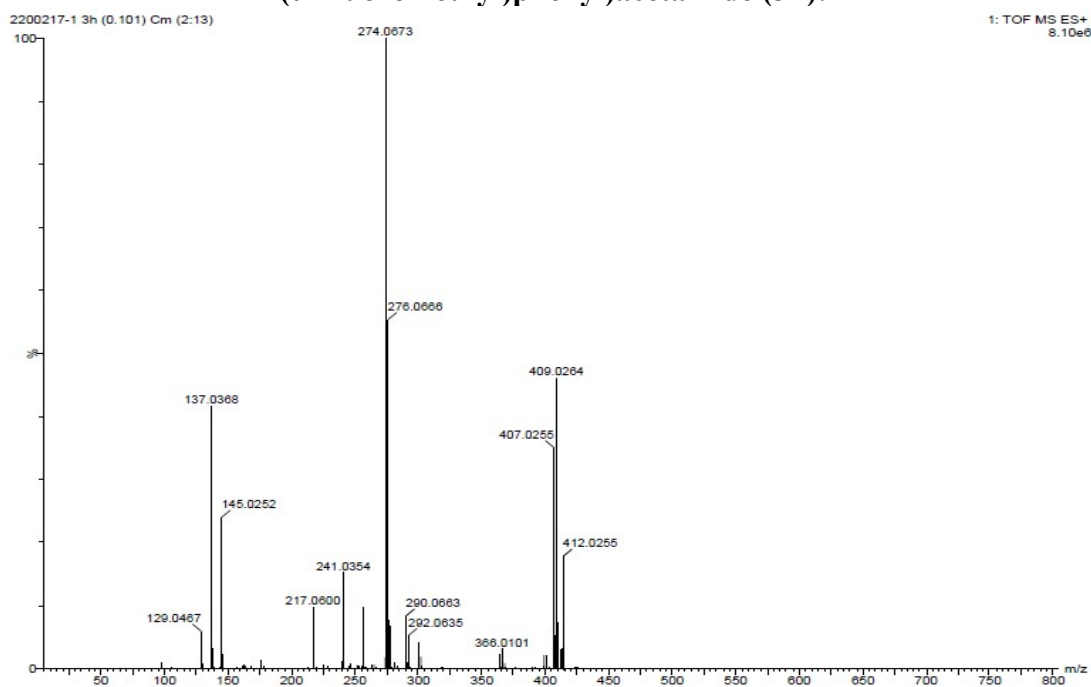

**(Z)-2-(2,4-Dioxo-5-(thiophen-2-ylmethylene)thiazolidin-3-yl)-N-(2,4,5-**

**trichlorophenyl)acetamide (3i):** yellow solid, yield 81%, MP 238–240 °C, FTIR (KBr,  $\text{cm}^{-1}$ ): 3444.13(NH), 3038.30 (Ar C–H), 1733.44 (C=O), 1157.24 (C–N).  $^1\text{H-NMR}$  ( $\delta$  ppm, DMSO- $d_6$ ): 4.338 (s, 2H,  $\text{CH}_2$ ), 7.458–7.723 (m, 6H, Ar-H), 11.880 (s, 1H, NH).  $^{13}\text{C-NMR}$  ( $\delta$  ppm, DMSO- $d_6$ ): 51.43, 114.54, 115.86, 117.68, 118.28, 121.15, 123.59, 123.99, 127.01, 127.48, 127.65, 128.09, 129.18, 129.95, 131.25, 135.56, 145.04, and 151.85. MS (m/z):  $\text{M}^+$  analyzed 445.9410,  $\text{M}^+$  predicted 445.9120.

**(Z)-2-(2,4-Dioxo-5-(thiophen-2-ylmethylene)thiazolidin-3-yl)-N-(2,4,5-trichlorophenyl)acetamide (3i):**

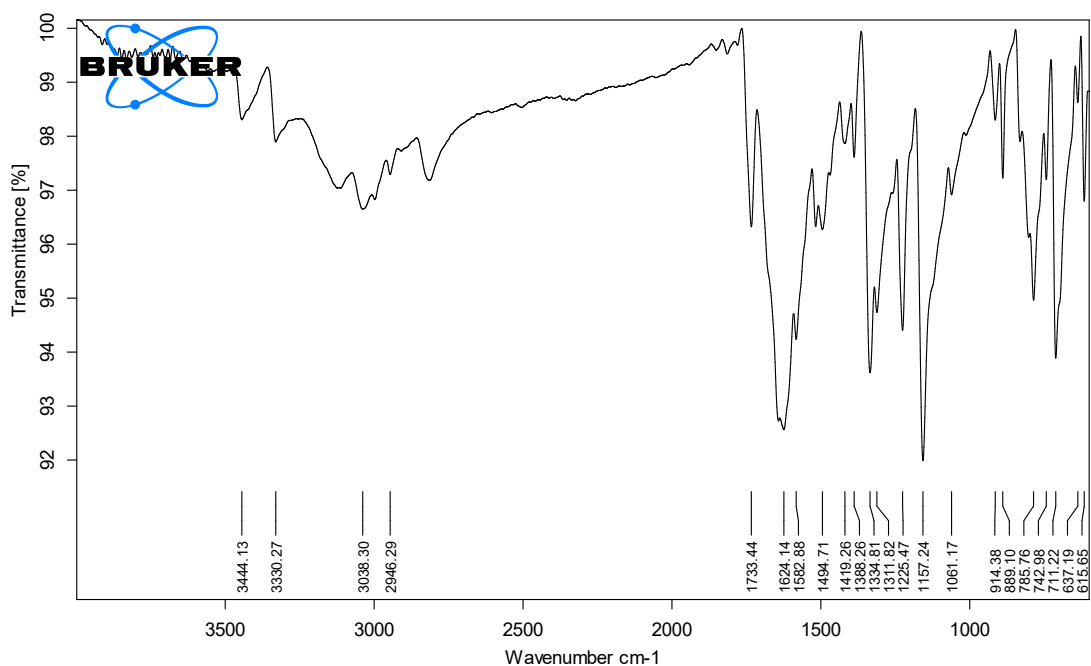

**(Z)-2-(2,4-Dioxo-5-(thiophen-2-ylmethylene)thiazolidin-3-yl)-N-(2,4,5-trichlorophenyl)acetamide (3i):**

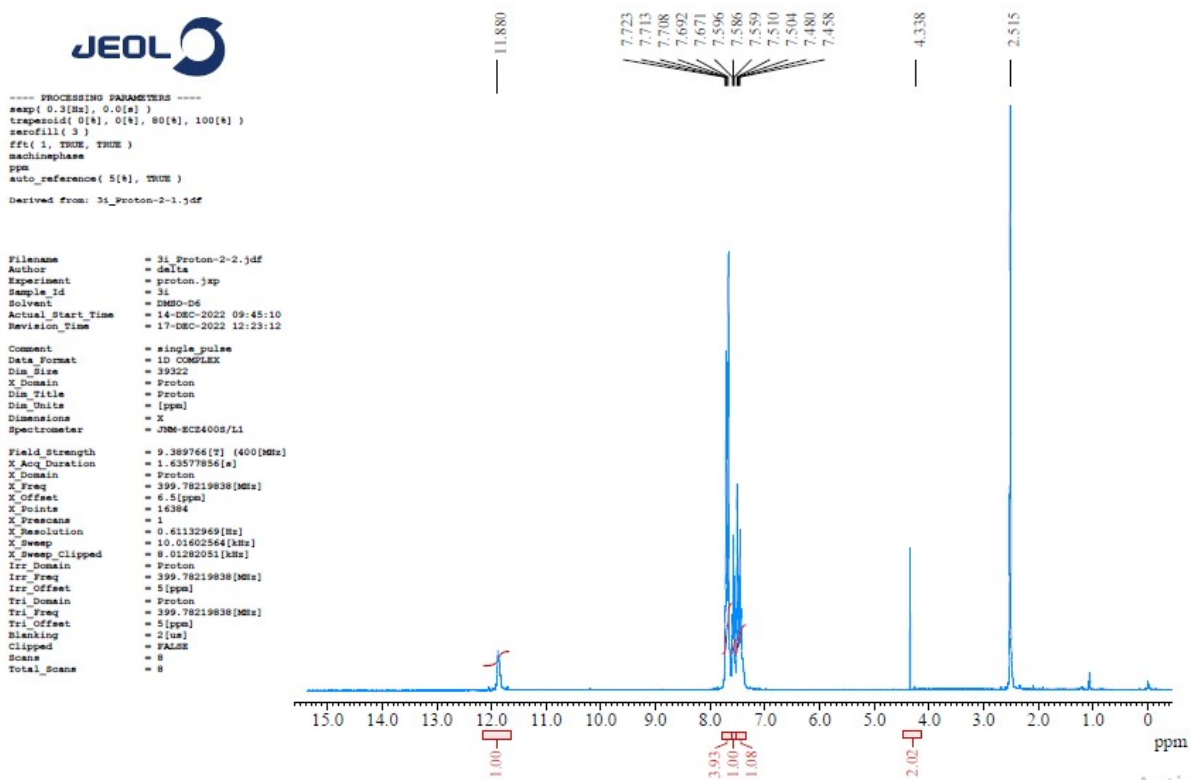

**(Z)-2-(2,4-Dioxo-5-(thiophen-2-ylmethylene)thiazolidin-3-yl)-N-(2,4,5-trichlorophenyl)acetamide (3i):**

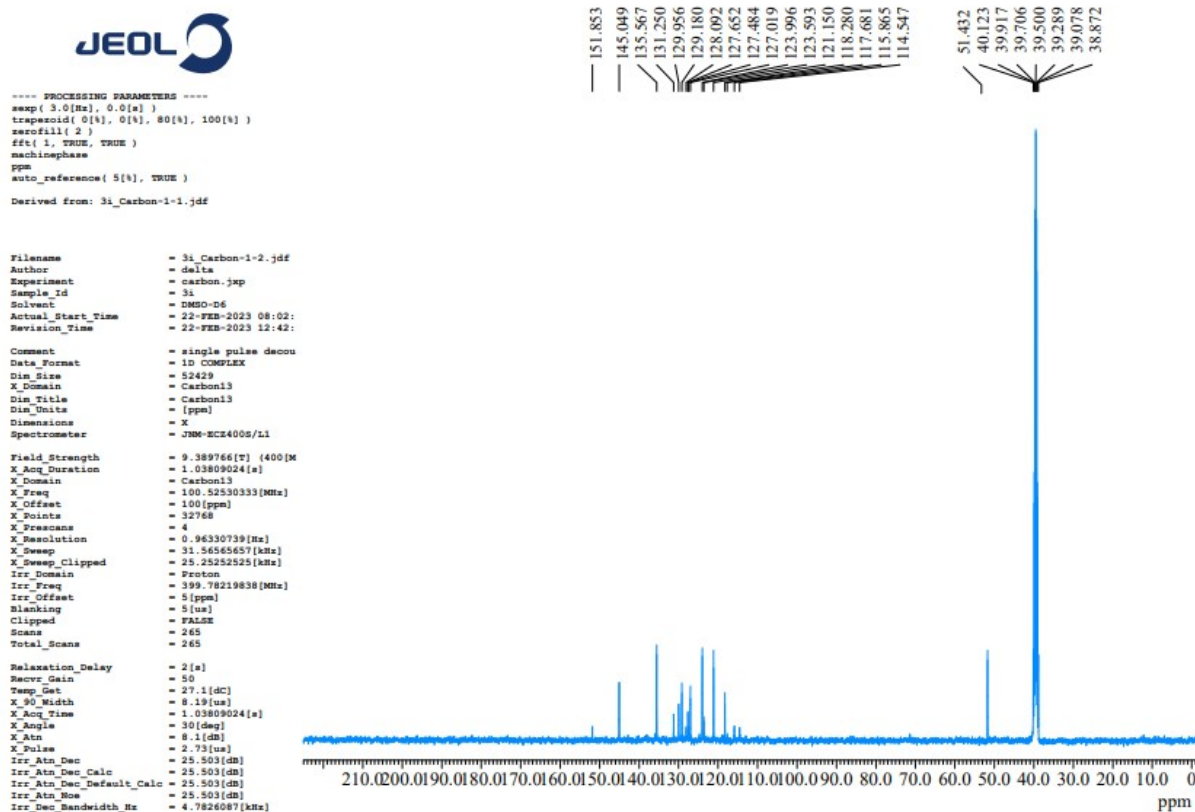

**(Z)-2-(2,4-Dioxo-5-(thiophen-2-ylmethylene)thiazolidin-3-yl)-N-(2,4,5-trichlorophenyl)acetamide (3i):**

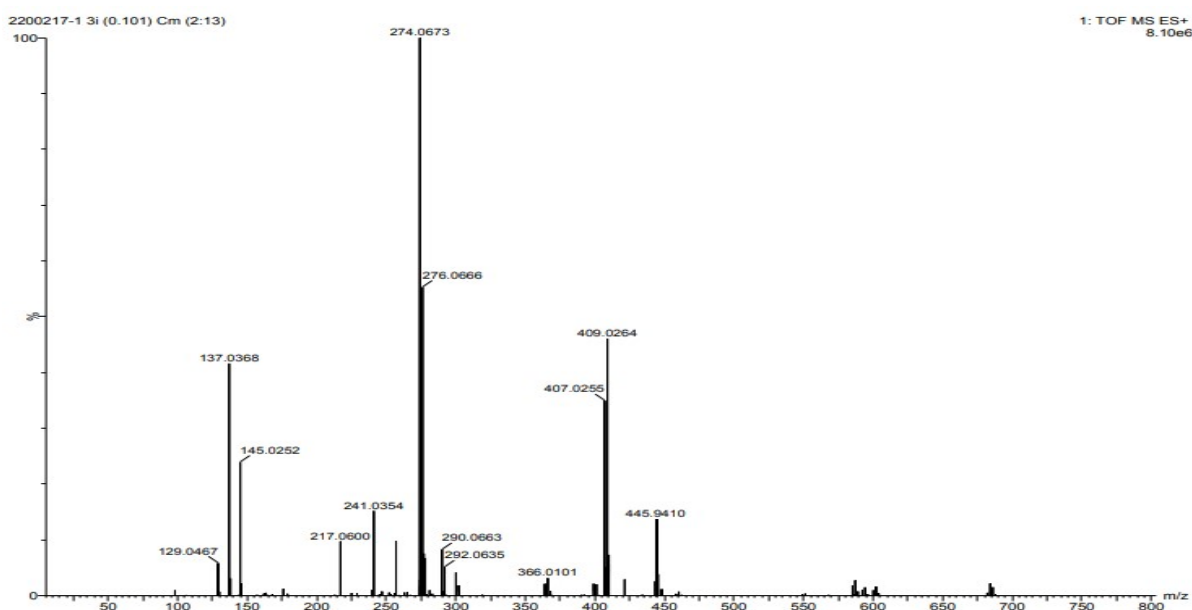

**(Z)-N-(3-Chloro-2-methylphenyl)-2-(2,4-dioxo-5-(thiophen-2-ylmethylene)thiazolidin-3-yl)acetamide (3j):** yellow solid, yield 77%, MP 224–226 °C, FTIR (KBr, cm<sup>-1</sup>): 3474.54 (NH), 3032.81 (Ar C–H), 1733.63 (C=O), 1158.37 (C–N). <sup>1</sup>H-NMR (δ ppm, DMSO-*d*<sub>6</sub>): 3.543 (s, 3H, CH<sub>3</sub>), 4.344 (s, 2H, CH<sub>2</sub>), 7.452–7.725 (m, 8H, Ar-H), 11.763 (s, 1H, NH). <sup>13</sup>C-NMR (δppm, DMSO-*d*<sub>6</sub>): 30.45, 55.49, 100.02, 112.44, 115.28, 120.21, 120.27, 129.00, 129.06, 131.27, 137.59, 144.60, 144.71, 147.38, 153.38, and 164.63. MS (m/z): M<sup>+</sup> analyzed 392.0101, M<sup>+</sup> predicted 392.0052.

**(Z)-N-(3-Chloro-2-methylphenyl)-2-(2,4-dioxo-5-(thiophen-2-ylmethylene)thiazolidin-3-yl)acetamide (3j):**

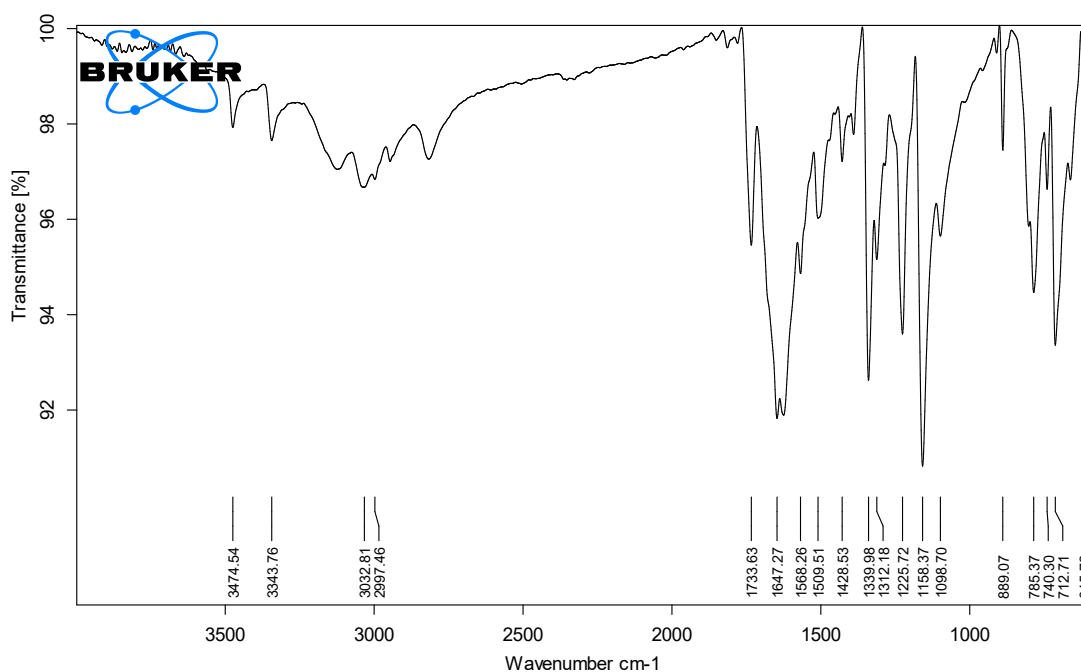



**(Z)-N-(3-Chloro-2-methylphenyl)-2-(2,4-dioxo-5-(thiophen-2-ylmethylene)thiazolidin-3-yl)acetamide(3j):**

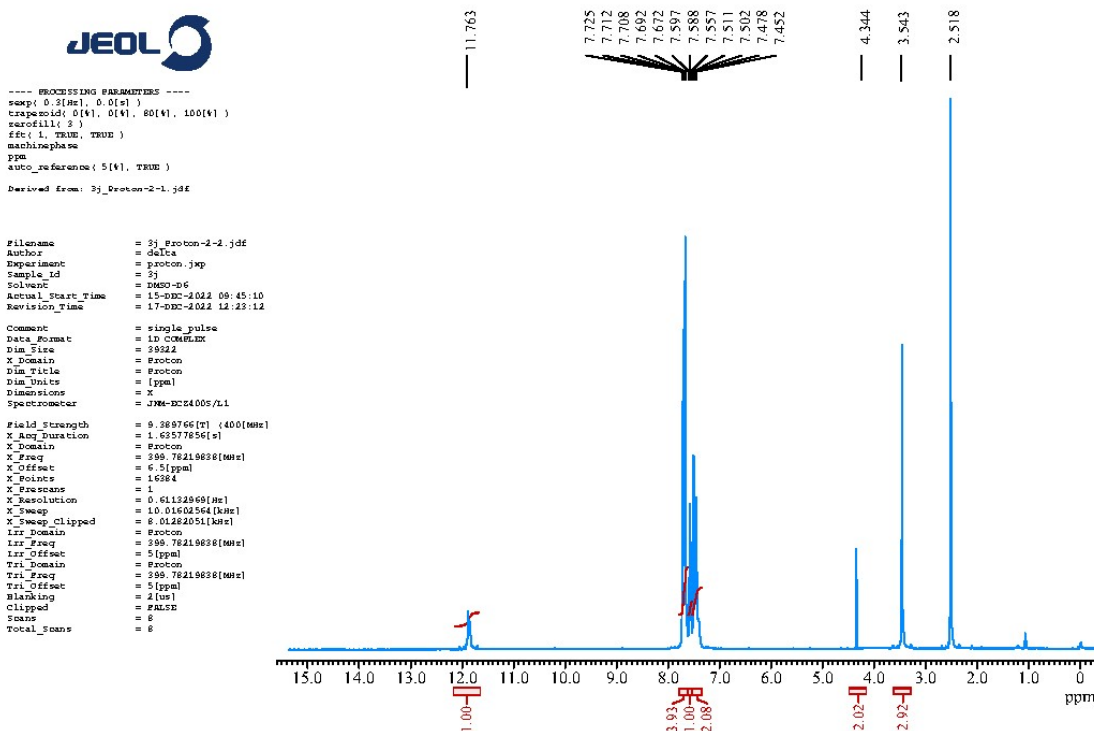

**(Z)-N-(3-Chloro-2-methylphenyl)-2-(2,4-dioxo-5-(thiophen-2-ylmethylene)thiazolidin-3-yl)acetamide(3j):**

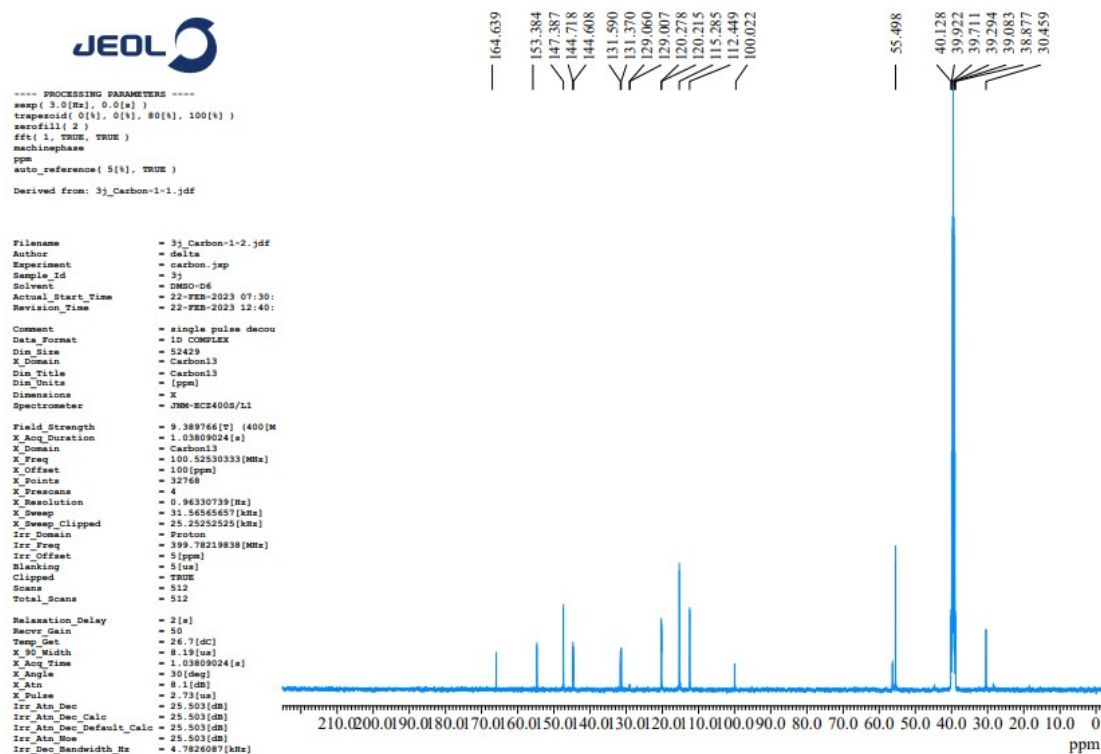

**(Z)-N-(3-Chloro-2-methylphenyl)-2-(2,4-dioxo-5-(thiophen-2-ylmethylene)thiazolidin-3-yl)acetamide (3j):**

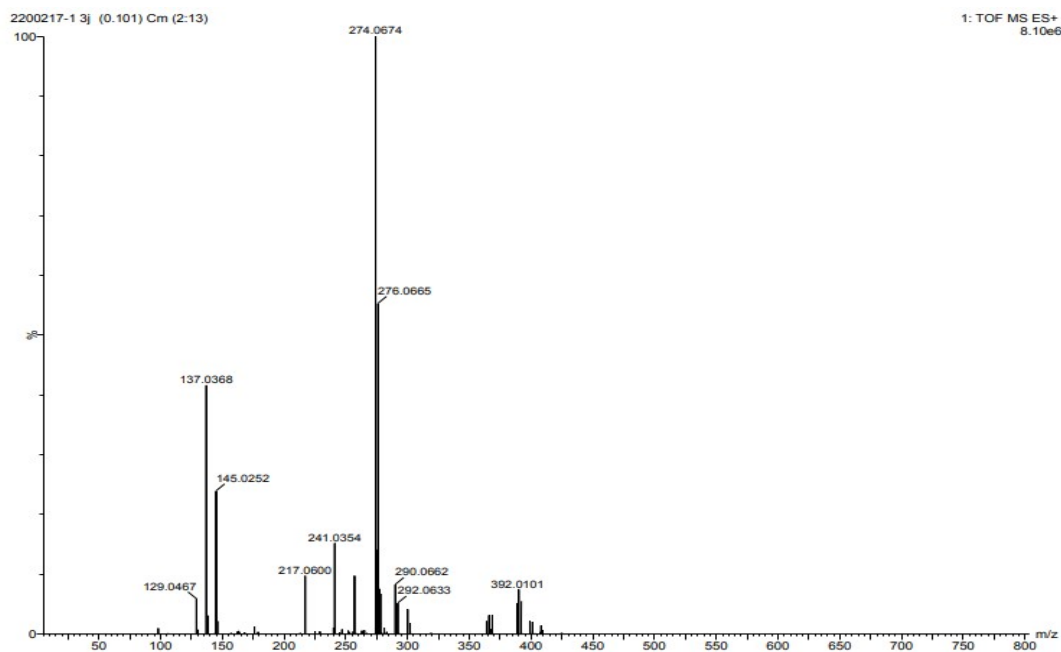

## Ethical approval

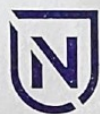

**NITTE**  
(Deemed to be University)

**NGSM INSTITUTE OF  
PHARMACEUTICAL SCIENCES**

(Established under Section 3 of UGC Act, 1956)  
Placed under Category 'A' by MHRD, GoI, Accredited with 'A' Grade by NAAC

Ref: NGSM/IAEC/2020-21/220

Date: 29<sup>th</sup> Dec 2020

To

Mr. Mahendra G. S.  
Research Scholar  
NGSMIPS  
Paneer, Deralakatte - 575 018

**Sub: Approval of protocol by IAEC**

The Institutional Animal Ethics Committee of NGSM Institute of Pharmaceutical Science has approved your protocol for experimentation on small animals for the project titled "Design synthesis of novel thiazolidinedione and rhodanine for antidiabetic activity" during the meeting held on 29<sup>th</sup> December, 2020. Approval number of your protocol is **NGSMIPS/IAEC/DEC-2020/219**.

**Chairman and Scientist In-charge of Animal House Facility**  
Dr. C. S. Shastry  
Principal
